# Supplementary material
Source: MDPI journal article supplement (https://www.mdpi.com/search?q=energies-10-01644)
Supplement: s001 [file energies-10-01644-s001.pdf]

# Supplementary Materials: Long-Term Stability Evaluation and Pillar Design Criterion for Room-And-Pillar Mines

Yang Yu, Shen-en Chen, Ka-zhong Deng, and Hong-dong Fan

**Table S1.** The failed and stable pillar cases in India.

| No. | Status | $H$ ,<br>(m) | $w_{pr}$ ,<br>(m) | $w_{cr}$ ,<br>(m) | $h$ ,<br>(m) | $\rho$ | $\delta$ | $SF_0$ | $d_{m'}$ ,<br>(m) | $SF_p$ |
|-----|--------|--------------|-------------------|-------------------|--------------|--------|----------|--------|-------------------|--------|
| 1   | F      | 30           | 3.6               | 5.7               | 4.5          | 2.6    | 45       | 6.0    | 3.4               | 0.0    |
| 2   | F      | 30           | 3.6               | 5.4               | 6            | 2.5    | 45       | 5.3    | 5.0               | 0.0    |
| 3   | F      | 36           | 3.9               | 6                 | 3            | 2.6    | 26       | 4.1    | 1.9               | 0.0    |
| 4   | F      | 30           | 4.5               | 4.5               | 5.4          | 3.1    | 25       | 4.5    | 3.9               | 0.0    |
| 5   | F      | 23           | 4.7               | 5.6               | 8.1          | 2.6    | 24       | 4.4    | 6.7               | 0.0    |
| 6   | F      | 90           | 5.4               | 6                 | 3.8          | 2.1    | 45       | 5.0    | 2.3               | 0.0    |
| 7   | F      | 129          | 7.5               | 6                 | 3.6          | 2.6    | 38       | 3.9    | 2.1               | 0.5    |
| 8   | F      | 54           | 5.4               | 6                 | 3.6          | 2.6    | 33       | 5.1    | 2.2               | 0.1    |
| 9   | F      | 56           | 5                 | 6.5               | 3.6          | 2.6    | 33       | 4.0    | 2.2               | 0.0    |
| 10  | F      | 42           | 4.5               | 4.5               | 4.8          | 2.6    | 47       | 7.9    | 3.3               | 0.0    |
| 11  | F      | 70           | 2.9               | 3.2               | 1.8          | 2.6    | 26       | 3.7    | 1.1               | 0.1    |
| 12  | F      | 51           | 3                 | 3.6               | 1.8          | 2.6    | 26       | 4.7    | 1.1               | 0.2    |
| 13  | F      | 160          | 19.8              | 4.2               | 6.6          | 2.6    | 27       | 5.2    | 3.3               | 2.0    |
| 14  | F      | 140          | 18.6              | 5.4               | 8.4          | 2.6    | 25       | 4.0    | 4.3               | 0.9    |
| 15  | S      | 36           | 5.4               | 6                 | 3            | 2.6    | 48       | 12.6   | 1.8               | 0.9    |
| 16  | S      | 48           | 9.9               | 6                 | 6            | 2.5    | 50       | 14.2   | 3.6               | 0.6    |
| 17  | S      | 270          | 8.1               | 3.6               | 3            | 2.6    | 46       | 4.1    | 1.7               | 1.1    |
| 18  | S      | 75           | 9.9               | 6.6               | 2.7          | 2.5    | 28       | 8.0    | 1.5               | 3.3    |
| 19  | S      | 38           | 7.2               | 3.9               | 5.1          | 2.5    | 33       | 12.4   | 3.0               | 0.2    |
| 20  | S      | 30           | 9                 | 6                 | 5.1          | 2.5    | 21       | 9.5    | 3.0               | 0.6    |
| 21  | S      | 102          | 10.1              | 2.4               | 4.8          | 2.5    | 35       | 9.2    | 2.3               | 2.1    |
| 22  | S      | 75           | 6.3               | 4.2               | 3            | 2.5    | 35       | 7.6    | 1.7               | 1.0    |
| 23  | S      | 106          | 16                | 4                 | 3.5          | 2.6    | 29       | 11.0   | 1.9               | 5.6    |
| 24  | S      | 38           | 18.3              | 4.2               | 5.1          | 2.5    | 33       | 30.0   | 2.7               | 12.8   |
| 25  | S      | 266          | 40                | 5                 | 4.8          | 2.5    | 43       | 9.9    | 2.5               | 7.1    |
| 26  | S      | 30           | 6                 | 6                 | 2.1          | 2.6    | 19       | 8.8    | 1.2               | 2.6    |
| 27  | S      | 36           | 9.3               | 7.2               | 3.6          | 2.1    | 40       | 20.5   | 2.0               | 4.9    |
| 28  | S      | 80           | 5.8               | 5.5               | 2            | 2.6    | 29       | 5.4    | 1.1               | 1.6    |
| 29  | S      | 85           | 7                 | 3.9               | 1.8          | 2.5    | 41       | 13.2   | 1.0               | 5.8    |

Note: S for stable pillar; F for failed pillar.

**Table S2.** The failed pillar cases in ordinary coal fields of South Africa.

| No. | $H$ ,<br>(m) | $w_{pr}$ ,<br>(m) | $w_{cr}$ ,<br>(m) | $h$ ,<br>(m) | $SF_0$ | $d_{m'}$ ,<br>(m) | $SF_p$ | No. | $H$ ,<br>(m) | $w_{pr}$ ,<br>(m) | $w_{cr}$ ,<br>(m) | $h$ ,<br>(m) | $SF_0$ | $d_{m'}$ ,<br>(m) | $SF_p$ |
|-----|--------------|-------------------|-------------------|--------------|--------|-------------------|--------|-----|--------------|-------------------|-------------------|--------------|--------|-------------------|--------|
| 1   | 76.2         | 4.88              | 6.1               | 1.37         | 3.7    | 0.8               | 1.5    | 41  | 57.9         | 6.1               | 7.62              | 3.96         | 2.7    | 2.4               | 0.1    |
| 2   | 55.5         | 7.43              | 6.62              | 3.8          | 4.5    | 2.2               | 0.5    | 42  | 41.1         | 4.27              | 6.4               | 3.05         | 3.1    | 1.9               | 0      |
| 3   | 78.2         | 10.53             | 6.47              | 5.16         | 4.2    | 3                 | 0.5    | 43  | 25.9         | 3.66              | 8.53              | 3.05         | 2.6    | 2                 | 0      |

|    |       |       |      |      |     |     |     |     |        |              |      |      |      |     |     |
|----|-------|-------|------|------|-----|-----|-----|-----|--------|--------------|------|------|------|-----|-----|
| 4  | 73.5  | 8.4   | 6.6  | 3.65 | 4.1 | 2.1 | 0.8 | 44  | 21.3   | 3.96         | 8.23 | 4.57 | 2.9  | 3.3 | 0   |
| 5  | 57.66 | 5.3   | 5.66 | 2.89 | 3.7 | 1.7 | 0.3 | 45  | 29.6   | 5.18         | 7.01 | 5.49 | 3.6  | 3.8 | 0   |
| 6  | 165.7 | 15    | 5    | 5.94 | 3.1 | 3.2 | 0.8 | 46  | 27.4   | 3.66         | 7.92 | 2.13 | 3.4  | 1.3 | 0.2 |
| 7  | 195   | 17    | 6    | 4.88 | 3.1 | 2.7 | 1.2 | 47  | 36.6   | 4.57         | 7.62 | 2.44 | 3.7  | 1.4 | 0.3 |
| 8  | 205   | 17    | 6    | 5.88 | 2.6 | 3.3 | 0.8 | 48  | 33.5   | 6.1          | 6.71 | 5.49 | 4.3  | 3.6 | 0   |
| 9  | 167.6 | 15.85 | 5.49 | 5.49 | 3.3 | 3   | 1   | 49  | 30.5   | 4.57         | 7.62 | 3.66 | 3.4  | 2.3 | 0   |
| 10 | 193.2 | 15.85 | 5.49 | 5.49 | 2.8 | 3   | 0.9 | 50  | 53.3   | 5.18         | 6.4  | 3.66 | 2.9  | 2.3 | 0   |
| 11 | 184.7 | 15.85 | 5.49 | 5.49 | 3   | 3   | 0.9 | 51  | 68.6   | 3.35         | 5.79 | 1.52 | 2.2  | 0.9 | 0.4 |
| 12 | 36.6  | 6.1   | 7.62 | 4.88 | 3.7 | 3.1 | 0   | 52  | 88.4   | 7.16         | 6.55 | 4.88 | 2.3  | 3   | 0   |
| 13 | 62.5  | 6.1   | 7.62 | 2.44 | 3.5 | 1.4 | 0.8 | 53  | 57.9   | 5.18         | 6.4  | 5.49 | 2.1  | 3.8 | 0   |
| 14 | 101   | 9     | 6    | 3.8  | 3.5 | 2.2 | 0.7 | 54  | 61     | 4.72         | 6.86 | 3.51 | 2.1  | 2.2 | 0   |
| 15 | 100   | 8.5   | 6.5  | 3.3  | 3.3 | 1.9 | 0.8 | 55  | 30.5   | 3.35         | 6.4  | 2.59 | 3.1  | 1.6 | 0   |
| 16 | 97    | 9     | 6.6  | 3.7  | 3.4 | 2.1 | 0.7 | 56  | 13.5   | 3.9          | 5.5  | 6    | 6.3  | 5.1 | 0   |
| 17 | 51.5  | 6     | 6    | 3.9  | 3.9 | 2.4 | 0.1 | 57  | 24     | 6.2          | 5.8  | 2.4  | 12.4 | 1.4 | 3   |
| 18 | 28.5  | 3.8   | 5.8  | 2.7  | 4.5 | 1.7 | 0   | 58s | 21.3   | 6.1          | 6.1  | 2.44 | 12.8 | 1.4 | 2.9 |
| 19 | 34    | 3.5   | 6.7  | 2.7  | 2.7 | 1.7 | 0   | 59s | 21.3   | 6.1          | 6.1  | 4.27 | 8.9  | 2.6 | 0.1 |
| 20 | 34    | 3.5   | 6.7  | 2.7  | 2.7 | 1.7 | 0   | 60s | 33.53  | 5.49         | 6.71 | 2.31 | 6.5  | 1.3 | 1.3 |
| 21 | 90    | 7.5   | 6    | 4.8  | 2.6 | 2.9 | 0.1 | 61s | 45.72  | 5.49         | 6.71 | 2.31 | 4.8  | 1.3 | 0.9 |
| 22 | 57    | 3.6   | 5.4  | 1.35 | 3.6 | 0.8 | 0.9 | 62s | 51.82  | 5.49         | 6.71 | 2.31 | 4.2  | 1.3 | 0.8 |
| 23 | 62    | 7.5   | 6.4  | 4    | 4.1 | 2.4 | 0.4 | 63s | 43.59  | 6.1          | 6.1  | 2.12 | 6.9  | 1.2 | 2   |
| 24 | 62    | 7.3   | 6.2  | 4    | 4   | 2.4 | 0.3 | 64s | 51.82  | 6.1          | 6.1  | 2.12 | 5.8  | 1.2 | 1.7 |
| 25 | 56    | 5.1   | 6.5  | 3.3  | 2.8 | 2   | 0.1 | 65s | 27.4   | 10.7<br>×4.5 | 4.57 | 2.44 | 18.1 | 1.4 | 2.4 |
| 26 | 33    | 6.4   | 6.4  | 4.88 | 5.4 | 3.1 | 0   | 66s | 21.3   | 5.49         | 6.71 | 3.05 | 8.5  | 1.8 | 0.6 |
| 27 | 22    | 3.5   | 6.5  | 1.6  | 6.2 | 0.9 | 1   | 67s | 33.53  | 6.1          | 5.49 | 2.13 | 9.9  | 1.2 | 2.9 |
| 28 | 62    | 6.1   | 6.1  | 4    | 3.2 | 2.4 | 0.1 | 68s | 45.72  | 7.62         | 6.1  | 2.44 | 8.2  | 1.4 | 2.7 |
| 29 | 62    | 6.1   | 6.1  | 4    | 3.2 | 2.4 | 0.1 | 69s | 23.1   | 5.49         | 6.1  | 1.83 | 12.2 | 1   | 3.9 |
| 30 | 41    | 6.4   | 6.4  | 6.2  | 3.7 | 4.1 | 0   | 70s | 42.67  | 5.49         | 6.71 | 2.13 | 5.4  | 1.2 | 1.3 |
| 31 | 41    | 6.4   | 6.4  | 6.2  | 3.7 | 4.1 | 0   | 71s | 51.82  | 5.49         | 6.71 | 2.13 | 4.5  | 1.2 | 1.1 |
| 32 | 41    | 6.4   | 6.4  | 6.2  | 3.7 | 4.1 | 0   | 72s | 60.92  | 5.49         | 6.71 | 2.13 | 3.8  | 1.2 | 0.9 |
| 33 | 35.5  | 5.5   | 5.5  | 2.2  | 7.9 | 1.3 | 1.8 | 73s | 22.86  | 6.1          | 6.1  | 3.05 | 10.3 | 1.8 | 1.2 |
| 34 | 32    | 3.3   | 6.4  | 2.3  | 3.1 | 1.4 | 0   | 74s | 42.67  | 6.71         | 5.49 | 1.83 | 9.8  | 1   | 4   |
| 35 | 32.5  | 3.2   | 6.5  | 2.1  | 3   | 1.3 | 0.1 | 75s | 51.82  | 6.71         | 5.49 | 2.13 | 7.3  | 1.2 | 2.5 |
| 36 | 43    | 4.8   | 6.2  | 2.8  | 4   | 1.7 | 0.2 | 76s | 60.92  | 6.71         | 5.49 | 1.83 | 6.9  | 1   | 2.8 |
| 37 | 86.4  | 7.5   | 6.5  | 4.6  | 2.6 | 2.8 | 0.1 | 77s | 76.2   | 7.62         | 6.1  | 1.37 | 7.2  | 0.7 | 4.2 |
| 38 | 102   | 7.6   | 6.2  | 4.5  | 2.4 | 2.7 | 0.1 | 78s | 173.74 | 15.85        | 5.49 | 2.29 | 5.6  | 1.2 | 3.7 |
| 39 | 61    | 6.1   | 6.1  | 4.57 | 3   | 2.9 | 0   | 79s | 181.36 | 18.29        | 6.1  | 2.44 | 5.6  | 1.3 | 3.8 |
| 40 | 61    | 6.1   | 7.62 | 3.05 | 3.1 | 1.8 | 0.3 |     |        |              |      |      |      |     |     |

Note: the s after case number stands for the pillar data that Salamon not used, as such pillar failures may because of weak roof or floor conditions (York et al. 2000), the data was not used in this paper.

**Table S3.** The failed pillar cases in Vaal Basin, Free State and Klip river coal fields of South Africa.

| No. | $H_r$<br>(m) | $w_{pr}$<br>(m) | $w_{cr}$<br>(m) | $h_r$<br>(m) | $SF_0$ | $d_{m'}$<br>(m) | $SF_p$ | No. | $H_r$<br>(m) | $w_{pr}$<br>(m) | $w_{cr}$<br>(m) | $h_r$<br>(m) | $SF_0$ | $d_{m'}$<br>(m) | $SF_p$ |
|-----|--------------|-----------------|-----------------|--------------|--------|-----------------|--------|-----|--------------|-----------------|-----------------|--------------|--------|-----------------|--------|
| 1   | 29           | 5.4             | 6.3             | 2.9          | 2.7    | 2.8             | 0.0    | 31  | 152.4        | 12.19           | 6.1             | 4.88         | 1.1    | 4.4             | 0.0    |

|    |      |       |      |      |     |     |     |     |       |               |      |      |     |     |     |
|----|------|-------|------|------|-----|-----|-----|-----|-------|---------------|------|------|-----|-----|-----|
| 2  | 60   | 7     | 6    | 1.82 | 2.7 | 1.6 | 0.6 | 32  | 41    | 13.1          | 6    | 5.5  | 4.2 | 4.9 | 0.2 |
| 3  | 53   | 5.6   | 6.1  | 1.8  | 2.2 | 1.6 | 0.3 | 33  | 35    | 9             | 6    | 2.7  | 5.0 | 2.4 | 0.8 |
| 4  | 21   | 6.75  | 5.25 | 3.2  | 5.8 | 3.0 | 0.0 | 34  | 45    | 6             | 6    | 3.5  | 1.9 | 3.4 | 0.0 |
| 5  | 19   | 6     | 6    | 3    | 5.0 | 2.9 | 0.0 | 35  | 46    | 5.78          | 6.22 | 3.29 | 1.8 | 3.2 | 0.0 |
| 6  | 23   | 6     | 6    | 2.9  | 4.2 | 2.7 | 0.0 | 36  | 51    | 5.76          | 6.24 | 3.41 | 1.5 | 3.4 | 0.0 |
| 7  | 40   | 7     | 5    | 2.8  | 3.6 | 2.6 | 0.1 | 37  | 113.7 | 12            | 6    | 2.75 | 2.2 | 2.4 | 0.6 |
| 8  | 42   | 4.5   | 5.5  | 2    | 2.1 | 1.9 | 0.0 | 38  | 103.5 | 11.66         | 6.34 | 2.94 | 2.1 | 2.6 | 0.5 |
| 9  | 50   | 7     | 5    | 2.3  | 3.3 | 2.1 | 0.4 | 39  | 47    | 5.9           | 6.1  | 3.21 | 1.8 | 3.1 | 0.0 |
| 10 | 55   | 7     | 5    | 2.2  | 3.1 | 2.0 | 0.4 | 40  | 90    | 9.1           | 5.9  | 2.53 | 2.1 | 2.2 | 0.4 |
| 11 | 87.8 | 6.1   | 6.1  | 1.98 | 1.4 | 1.8 | 0.2 | 41  | 98    | 10            | 6    | 3    | 1.9 | 2.7 | 0.3 |
| 12 | 70   | 7.5   | 5    | 1.8  | 3.0 | 1.6 | 0.8 | 42  | 59.6  | 8.9           | 6.1  | 3.57 | 2.4 | 3.3 | 0.1 |
| 13 | 63.5 | 7.5   | 5    | 2.1  | 3.0 | 1.9 | 0.6 | 43  | 40    | 5.7           | 6.3  | 3.15 | 2.0 | 3.1 | 0.0 |
| 14 | 61   | 6     | 5    | 1.9  | 2.5 | 1.7 | 0.3 | 44  | 103.7 | 11.13         | 6.37 | 3.05 | 1.9 | 2.7 | 0.4 |
| 15 | 61   | 7.5   | 5    | 1.9  | 3.3 | 1.7 | 0.8 | 45  | 99.6  | 11.44         | 6.06 | 3.07 | 2.2 | 2.7 | 0.4 |
| 16 | 74   | 10    | 5    | 4    | 2.4 | 3.6 | 0.1 | 46  | 105.9 | 11.5          | 6    | 3.04 | 2.1 | 2.7 | 0.4 |
| 17 | 74   | 7.7   | 4.8  | 2    | 2.8 | 1.8 | 0.6 | 47  | 106.4 | 11.5          | 6    | 3.11 | 2.0 | 2.7 | 0.4 |
| 18 | 112  | 10.55 | 6.45 | 2.82 | 1.8 | 2.5 | 0.4 | 48  | 106.5 | 11.56         | 5.94 | 3.05 | 2.1 | 2.7 | 0.5 |
| 19 | 108  | 10.55 | 6.48 | 3.18 | 1.7 | 2.8 | 0.3 | 49  | 103   | 14.02         | 5.98 | 3.38 | 2.5 | 2.9 | 0.6 |
| 20 | 82   | 10    | 5    | 2.8  | 2.7 | 2.5 | 0.5 | 50  | 105.5 | 14.15         | 5.85 | 3.06 | 2.6 | 2.6 | 0.8 |
| 21 | 96   | 12    | 6    | 2.9  | 2.5 | 2.5 | 0.6 | 51  | 99    | 14.24         | 5.76 | 3.34 | 2.7 | 2.9 | 0.7 |
| 22 | 70   | 12.5  | 5.5  | 2.9  | 3.7 | 2.5 | 1.1 | 52  | 99    | 14.65         | 5.35 | 3.3  | 2.9 | 2.9 | 0.9 |
| 23 | 88   | 11    | 6    | 2.9  | 2.4 | 2.5 | 0.5 | 53s | 87.8  | 7.62          | 6.1  | 1.68 | 2.2 | 1.5 | 0.7 |
| 24 | 112  | 11.5  | 5.5  | 2.9  | 2.1 | 2.5 | 0.5 | 54s | 17.07 | 4.57          | 4.57 | 2.44 | 5.6 | 2.3 | 0.0 |
| 25 | 96   | 12    | 6    | 6    | 1.5 | 5.4 | 0.0 | 55s | 17.07 | 4.57          | 10.7 | 2.44 | 2.0 | 2.3 | 0.0 |
| 26 | 82   | 12    | 6    | 3    | 2.8 | 2.6 | 0.7 | 56s | 27.4  | 10.7<br>×4.57 | 4.57 | 2.44 | 7.2 | 2.2 | 0.0 |
| 27 | 104  | 12    | 6    | 3    | 2.2 | 2.6 | 0.5 | 57s | 27.4  | 9.75<br>×4.57 | 4.57 | 2.44 | 6.7 | 2.2 | 0.0 |
| 28 | 128  | 12.8  | 5.5  | 5.5  | 1.4 | 4.8 | 0.0 | 58s | 12.8  | 4.57          | 6.1  | 1.83 | 6.6 | 1.7 | 0.3 |
| 29 | 128  | 9.75  | 5.49 | 3.66 | 1.3 | 3.3 | 0.1 | 59s | 29.6  | 10.7<br>×4.57 | 4.57 | 2.44 | 6.7 | 2.2 | 0.0 |
| 30 | 57.9 | 5.18  | 6.4  | 3.66 | 1.1 | 3.8 | 0.0 |     |       |               |      |      |     |     |     |

**Table S4.** The stable pillar cases in ordinary coal fields of South Africa.

| No. | $H$ ,<br>(m) | $w_{pr}$ ,<br>(m) | $w_{cr}$ ,<br>(m) | $h$ ,<br>(m) | $SF_0$ | $d_{m'}$ ,<br>(m) | $SF_p$ | No. | $H$ ,<br>(m) | $w_{pr}$ ,<br>(m) | $w_{cr}$ ,<br>(m) | $h$ ,<br>(m) | $SF_0$ | $d_{m'}$ ,<br>(m) | $SF_p$ |
|-----|--------------|-------------------|-------------------|--------------|--------|-------------------|--------|-----|--------------|-------------------|-------------------|--------------|--------|-------------------|--------|
| 1   | 36.2         | 5.7               | 6.27              | 3.8          | 5.0    | 2.3               | 0.1    | 160 | 108.51       | 8.53              | 6.71              | 2.29         | 3.8    | 1.3               | 1.6    |
| 2   | 39.95        | 6.89              | 6.08              | 3.7          | 6.2    | 2.2               | 0.5    | 161 | 46.1         | 7.1               | 6.9               | 3.8          | 4.9    | 2.2               | 0.4    |
| 3   | 55.2         | 8.98              | 6.96              | 3.95         | 5.5    | 2.3               | 1.0    | 162 | 50           | 9.3               | 5.7               | 3.65         | 7.8    | 2.1               | 1.8    |
| 4   | 30.35        | 8.96              | 6.06              | 3.85         | 11.3   | 2.2               | 2.1    | 163 | 58.3         | 8.47              | 6                 | 3.8          | 5.6    | 2.2               | 0.9    |
| 5   | 41.35        | 8                 | 5.98              | 3.6          | 7.6    | 2.1               | 1.2    | 164 | 59.3         | 11                | 6                 | 3.7          | 7.7    | 2.1               | 2.4    |
| 6   | 57.34        | 9.07              | 5.99              | 3.84         | 6.2    | 2.2               | 1.2    | 165 | 196          | 15                | 6                 | 2.6          | 4.1    | 1.4               | 2.5    |
| 7   | 63.15        | 8.02              | 6.11              | 1.65         | 8.2    | 0.9               | 4.4    | 166 | 64.92        | 20.57             | 6                 | 3.5          | 13.9   | 1.9               | 8.5    |
| 8   | 40.86        | 7.55              | 7.63              | 2.92         | 6.5    | 1.7               | 1.6    | 167 | 55           | 11.8              | 6.2               | 3.41         | 9.3    | 1.9               | 3.6    |
| 9   | 30.55        | 8.07              | 7.11              | 3.2          | 9.6    | 1.8               | 2.2    | 168 | 65           | 10.98             | 6.02              | 3.2          | 7.7    | 1.8               | 2.9    |
| 10  | 49.82        | 7.63              | 7.67              | 3.05         | 5.2    | 1.7               | 1.2    | 169 | 51           | 8.89              | 6.11              | 3.27         | 7.4    | 1.9               | 2.0    |
| 11  | 47.07        | 8.29              | 6.89              | 3.37         | 6.4    | 1.9               | 1.4    | 170 | 68           | 11.66             | 6.34              | 3.4          | 7.3    | 1.9               | 2.8    |

|    |        |       |      |      |      |     |      |     |        |       |      |      |     |     |     |
|----|--------|-------|------|------|------|-----|------|-----|--------|-------|------|------|-----|-----|-----|
| 12 | 66.95  | 7.77  | 7.5  | 3    | 4.1  | 1.7 | 1.0  | 171 | 46     | 8.6   | 6.4  | 3.55 | 7.1 | 2.0 | 1.5 |
| 13 | 25.98  | 3.11  | 5.53 | 1.34 | 5.9  | 0.8 | 1.1  | 172 | 74     | 11.31 | 5.69 | 3.41 | 7.0 | 1.9 | 2.5 |
| 14 | 26.83  | 2.91  | 5.09 | 1.33 | 5.7  | 0.8 | 0.9  | 173 | 68     | 10.87 | 6.13 | 3.37 | 6.9 | 1.9 | 2.4 |
| 15 | 42.61  | 4.38  | 5.07 | 1.61 | 6.2  | 0.9 | 1.7  | 174 | 68     | 12.9  | 7.1  | 4.06 | 6.7 | 2.3 | 2.3 |
| 16 | 23     | 4     | 5.68 | 1.58 | 8.9  | 0.9 | 2.0  | 175 | 54     | 8.92  | 6.08 | 3.58 | 6.6 | 2.0 | 1.5 |
| 17 | 23.76  | 4.3   | 5.21 | 1.5  | 11.0 | 0.8 | 3.2  | 176 | 70     | 10.68 | 6.32 | 3.25 | 6.6 | 1.8 | 2.4 |
| 18 | 23.54  | 4.24  | 5.38 | 1.54 | 10.3 | 0.9 | 2.8  | 177 | 49     | 8.57  | 6.43 | 3.69 | 6.5 | 2.1 | 1.2 |
| 19 | 26.75  | 4.54  | 4.97 | 1.65 | 10.5 | 0.9 | 2.9  | 178 | 51     | 8.65  | 6.35 | 3.64 | 6.4 | 2.1 | 1.3 |
| 20 | 19.4   | 4.26  | 5.22 | 1.4  | 13.9 | 0.8 | 4.5  | 179 | 72     | 12.89 | 7.11 | 4.15 | 6.3 | 2.3 | 2.1 |
| 21 | 20.8   | 4.24  | 5.18 | 1.38 | 13.1 | 0.8 | 4.3  | 180 | 77     | 10.04 | 5.96 | 2.94 | 6.2 | 1.6 | 2.4 |
| 22 | 23.33  | 4.37  | 5.08 | 1.33 | 12.8 | 0.7 | 4.6  | 181 | 57     | 9.35  | 6.65 | 3.65 | 6.1 | 2.1 | 1.4 |
| 23 | 58.89  | 8.06  | 5.7  | 3    | 6.3  | 1.7 | 1.6  | 182 | 75     | 10.7  | 6.3  | 3.41 | 6.0 | 1.9 | 2.0 |
| 24 | 96.2   | 8.06  | 5.77 | 3.1  | 3.7  | 1.8 | 0.9  | 183 | 78     | 10.7  | 6.3  | 3.35 | 5.8 | 1.9 | 2.0 |
| 25 | 33.94  | 8.17  | 5.52 | 2.38 | 13.3 | 1.3 | 5.1  | 184 | 54     | 8.52  | 6.48 | 3.69 | 5.8 | 2.1 | 1.1 |
| 26 | 39.1   | 6.63  | 6.36 | 2.6  | 7.3  | 1.5 | 1.7  | 185 | 56     | 8.59  | 6.41 | 3.63 | 5.8 | 2.1 | 1.1 |
| 27 | 36.5   | 7.25  | 6.3  | 2.68 | 8.7  | 1.5 | 2.3  | 186 | 64.92  | 9     | 6    | 3.6  | 5.6 | 2.1 | 1.2 |
| 28 | 24.15  | 6.1   | 6.25 | 2.65 | 10.5 | 1.5 | 1.9  | 187 | 73     | 10.63 | 6.37 | 3.85 | 5.6 | 2.2 | 1.5 |
| 29 | 25.7   | 6.15  | 6.17 | 2.6  | 10.2 | 1.5 | 2.0  | 188 | 81     | 13.01 | 6.99 | 4.31 | 5.6 | 2.4 | 1.8 |
| 30 | 18.58  | 4.86  | 6.16 | 2.78 | 9.5  | 1.7 | 0.6  | 189 | 64.92  | 9     | 6    | 3.72 | 5.5 | 2.1 | 1.1 |
| 31 | 21.5   | 5.09  | 5.96 | 2.75 | 9.2  | 1.6 | 0.7  | 190 | 75     | 10.03 | 6.97 | 3.07 | 5.5 | 1.7 | 2.0 |
| 32 | 44.95  | 5.03  | 6.01 | 2.68 | 4.3  | 1.6 | 0.4  | 191 | 84     | 12.97 | 7.03 | 4.31 | 5.3 | 2.4 | 1.7 |
| 33 | 26.51  | 4.32  | 6.68 | 2.65 | 5.1  | 1.6 | 0.2  | 192 | 79     | 13.58 | 6.42 | 5.89 | 5.2 | 3.4 | 1.0 |
| 34 | 97.27  | 8.63  | 6.04 | 1.37 | 6.7  | 0.7 | 4.2  | 193 | 74     | 9.9   | 7.1  | 3.33 | 5.1 | 1.9 | 1.6 |
| 35 | 165.45 | 11.66 | 6.32 | 1.45 | 5.3  | 0.8 | 3.7  | 194 | 71     | 12.32 | 6.68 | 5.84 | 5.0 | 3.4 | 0.7 |
| 36 | 167.68 | 12.98 | 6.43 | 1.45 | 5.8  | 0.8 | 4.3  | 195 | 73     | 10.21 | 6.79 | 3.93 | 5.0 | 2.2 | 1.2 |
| 37 | 183.83 | 12.99 | 6.93 | 1.23 | 5.6  | 0.6 | 4.3  | 196 | 83     | 13.66 | 6.34 | 6.13 | 4.8 | 3.5 | 0.8 |
| 38 | 54     | 6     | 6.54 | 1.2  | 7.3  | 0.7 | 4.0  | 197 | 75     | 11.03 | 5.97 | 5.5  | 4.7 | 3.2 | 0.6 |
| 39 | 112    | 17    | 5.5  | 1.05 | 15.6 | 0.5 | 13.2 | 198 | 77     | 10.22 | 6.78 | 4.05 | 4.7 | 2.3 | 1.1 |
| 40 | 98.15  | 12.56 | 5.23 | 2.65 | 7.3  | 1.4 | 3.9  | 199 | 71     | 10.7  | 6.3  | 5.5  | 4.6 | 3.2 | 0.5 |
| 41 | 64.79  | 13.03 | 5.37 | 3.08 | 10.3 | 1.7 | 4.9  | 200 | 76     | 10.8  | 6.2  | 5.5  | 4.4 | 3.2 | 0.5 |
| 42 | 80.5   | 6.58  | 6.39 | 1.65 | 4.7  | 0.9 | 2.1  | 201 | 66     | 10.92 | 7.08 | 6.45 | 4.2 | 3.9 | 0.2 |
| 43 | 54.6   | 5.67  | 6.37 | 1.6  | 5.7  | 0.9 | 2.3  | 202 | 76     | 8.85  | 7.15 | 3.48 | 4.1 | 2.0 | 1.0 |
| 44 | 25.15  | 4.39  | 6.54 | 1.65 | 7.8  | 0.9 | 2.0  | 203 | 77     | 9.81  | 7.19 | 4.86 | 3.7 | 2.8 | 0.4 |
| 45 | 35.73  | 5     | 6.12 | 1.73 | 7.1  | 1.0 | 2.1  | 204 | 93.8   | 14    | 6    | 3.6  | 6.5 | 2.0 | 2.9 |
| 46 | 55.7   | 6.85  | 6.13 | 1.7  | 7.3  | 0.9 | 3.3  | 205 | 93.8   | 14.92 | 6    | 3    | 7.8 | 1.6 | 4.3 |
| 47 | 52.5   | 5.66  | 6.38 | 1.7  | 5.6  | 0.9 | 2.1  | 206 | 93.8   | 14.7  | 6    | 3.2  | 7.4 | 1.7 | 3.8 |
| 48 | 35.5   | 4.6   | 6.81 | 2    | 5.0  | 1.2 | 0.9  | 207 | 109    | 17.5  | 6.48 | 3.67 | 6.6 | 2.0 | 3.5 |
| 49 | 40.33  | 4.53  | 6.52 | 1.83 | 4.8  | 1.0 | 1.0  | 208 | 106    | 16.47 | 7.5  | 3.5  | 6.1 | 1.9 | 3.2 |
| 50 | 22.62  | 4.8   | 6.2  | 1.65 | 10.7 | 0.9 | 3.2  | 209 | 92.28  | 17.07 | 6.93 | 3.87 | 7.1 | 2.1 | 3.5 |
| 51 | 28.75  | 5     | 6.08 | 2    | 8.1  | 1.1 | 1.8  | 210 | 122    | 21    | 6.71 | 3.29 | 7.5 | 1.8 | 4.7 |
| 52 | 22.3   | 6.24  | 5.74 | 3.5  | 10.6 | 2.1 | 0.7  | 211 | 122    | 21.2  | 6.71 | 3.29 | 7.5 | 1.8 | 4.8 |
| 53 | 37.7   | 7.05  | 5.94 | 3.06 | 7.9  | 1.8 | 1.4  | 212 | 97.54  | 9.14  | 6.1  | 3.2  | 4.1 | 1.8 | 1.2 |
| 54 | 36.26  | 6.23  | 6.82 | 2.63 | 6.6  | 1.5 | 1.3  | 213 | 106.68 | 15.24 | 6.1  | 4.88 | 5.0 | 2.7 | 1.7 |
| 55 | 50.17  | 5.85  | 7.04 | 2.6  | 4.2  | 1.5 | 0.7  | 214 | 45.72  | 4.88  | 6.1  | 1.65 | 5.5 | 0.9 | 1.7 |
| 56 | 37.08  | 6.29  | 6.65 | 2.78 | 6.5  | 1.6 | 1.1  | 215 | 60.96  | 4.88  | 6.1  | 1.55 | 4.3 | 0.9 | 1.5 |
| 57 | 61.1   | 7.08  | 6.61 | 4.49 | 3.4  | 2.7 | 0.1  | 216 | 60.96  | 7.01  | 6.71 | 2.59 | 4.8 | 1.5 | 1.3 |
| 58 | 42     | 5.38  | 6.78 | 3.96 | 3.5  | 2.5 | 0.0  | 217 | 30.48  | 2.74  | 5.49 | 1.55 | 3.7 | 0.9 | 0.2 |

|     |        |       |      |      |      |     |     |     |        |       |      |      |      |     |      |
|-----|--------|-------|------|------|------|-----|-----|-----|--------|-------|------|------|------|-----|------|
| 59  | 39.33  | 8.05  | 6    | 2.68 | 9.7  | 1.5 | 3.1 | 218 | 85.34  | 7.62  | 6.1  | 3.2  | 3.7  | 1.8 | 0.7  |
| 60  | 59.16  | 7.17  | 6.57 | 3.51 | 4.3  | 2.1 | 0.5 | 219 | 167.64 | 14.33 | 3.69 | 1.98 | 7.0  | 1.1 | 4.7  |
| 61  | 45.72  | 5.49  | 5.18 | 1.83 | 7.3  | 1.0 | 2.3 | 220 | 108.51 | 7.62  | 6.71 | 2.29 | 3.3  | 1.3 | 1.2  |
| 62  | 76.2   | 6.71  | 5.49 | 2.74 | 4.2  | 1.6 | 0.9 | 221 | 42.67  | 4.27  | 5.49 | 2.59 | 4.0  | 1.6 | 0.2  |
| 63  | 85.34  | 8.23  | 5.49 | 3.2  | 4.4  | 1.8 | 1.0 | 222 | 140.21 | 17.37 | 5.49 | 2.44 | 7.3  | 1.3 | 4.9  |
| 64  | 121.92 | 12.8  | 5.49 | 2.29 | 6.4  | 1.2 | 3.8 | 223 | 160.93 | 14.94 | 6.31 | 2.96 | 4.5  | 1.6 | 2.5  |
| 65  | 97.54  | 9.75  | 5.49 | 3.2  | 4.8  | 1.8 | 1.5 | 224 | 180.44 | 15.24 | 5.97 | 2.99 | 4.2  | 1.6 | 2.3  |
| 66  | 108    | 9     | 6    | 1.14 | 7.2  | 0.6 | 5.0 | 225 | 163.98 | 15    | 6.22 | 2.8  | 4.6  | 1.5 | 2.6  |
| 67  | 108    | 9     | 6    | 1.1  | 7.4  | 0.6 | 5.2 | 226 | 146    | 16.46 | 5.49 | 2.41 | 6.7  | 1.3 | 4.4  |
| 68  | 150    | 9     | 6    | 1.15 | 5.2  | 0.6 | 3.6 | 227 | 198.12 | 17.16 | 5.7  | 2.83 | 4.5  | 1.5 | 2.8  |
| 69  | 208    | 17    | 6    | 1.2  | 7.3  | 0.6 | 6.1 | 228 | 182.88 | 15.85 | 5.49 | 4.88 | 3.2  | 2.7 | 1.2  |
| 70  | 208    | 17    | 6    | 1.1  | 7.8  | 0.6 | 6.5 | 229 | 36.58  | 7.32  | 4.88 | 1.83 | 14.1 | 1.0 | 6.4  |
| 71  | 166    | 17    | 6    | 1.48 | 8.0  | 0.8 | 6.3 | 230 | 91.44  | 7.62  | 6.1  | 1.68 | 5.2  | 0.9 | 2.7  |
| 72  | 174    | 17    | 6    | 1.17 | 8.9  | 0.6 | 7.4 | 231 | 60.96  | 9.14  | 6.1  | 4.88 | 4.9  | 2.9 | 0.4  |
| 73  | 64.47  | 9     | 6    | 1.89 | 8.6  | 1.0 | 4.6 | 232 | 76.2   | 10.67 | 6.1  | 4.88 | 4.8  | 2.8 | 0.7  |
| 74  | 50     | 10    | 6    | 3.8  | 8.0  | 2.2 | 2.0 | 233 | 91.44  | 12.19 | 6.1  | 4.88 | 4.6  | 2.8 | 1.0  |
| 75  | 34.6   | 12.21 | 5.6  | 3.4  | 16.4 | 1.9 | 6.6 | 234 | 45.72  | 6.1   | 6.1  | 3.05 | 5.2  | 1.8 | 0.6  |
| 76  | 77.65  | 12    | 5.84 | 3.8  | 6.5  | 2.1 | 2.2 | 235 | 178.49 | 19    | 6    | 2.3  | 6.2  | 1.2 | 4.4  |
| 77  | 55.75  | 10.28 | 6    | 2.8  | 9.1  | 1.5 | 3.8 | 236 | 195.15 | 20    | 6    | 2.1  | 6.3  | 1.1 | 4.7  |
| 78  | 55.75  | 11    | 6    | 3    | 9.4  | 1.7 | 3.9 | 237 | 203.42 | 19    | 6    | 1.7  | 6.6  | 0.9 | 5.2  |
| 79  | 79.92  | 9     | 6    | 2.9  | 5.3  | 1.6 | 1.7 | 238 | 203.42 | 19    | 6    | 1.7  | 6.6  | 0.9 | 5.2  |
| 80  | 34.15  | 8     | 6    | 3    | 10.3 | 1.7 | 2.6 | 239 | 42.67  | 5.49  | 5.49 | 2.59 | 5.9  | 1.5 | 0.8  |
| 81  | 36.53  | 7     | 6    | 3    | 8.1  | 1.7 | 1.5 | 240 | 91.44  | 6.1   | 6.1  | 1.68 | 3.8  | 0.9 | 1.6  |
| 82  | 45.72  | 4.27  | 5.49 | 1.19 | 6.2  | 0.7 | 2.5 | 241 | 48.77  | 7.32  | 6.4  | 2.44 | 6.9  | 1.4 | 2.2  |
| 83  | 68.58  | 5.18  | 5.49 | 1.19 | 5.6  | 0.7 | 2.7 | 242 | 83.92  | 11.47 | 6    | 3    | 6.5  | 1.7 | 2.8  |
| 84  | 91.44  | 6.1   | 5.49 | 1.19 | 5.3  | 0.6 | 3.0 | 243 | 87.6   | 12    | 6    | 2.8  | 6.9  | 1.5 | 3.3  |
| 85  | 76.2   | 7.62  | 6.1  | 1.37 | 7.2  | 0.7 | 4.2 | 244 | 45.72  | 6.1   | 6.1  | 3.96 | 4.3  | 2.4 | 0.1  |
| 86  | 30.48  | 5.49  | 6.71 | 2.59 | 6.7  | 1.5 | 0.9 | 245 | 60.96  | 7.62  | 6.1  | 3.96 | 4.5  | 2.3 | 0.4  |
| 87  | 63.64  | 14    | 6    | 3    | 10.8 | 1.6 | 5.6 | 246 | 45.72  | 6.1   | 6.1  | 1.68 | 7.6  | 0.9 | 3.1  |
| 88  | 70.79  | 12    | 6    | 2.2  | 10.0 | 1.2 | 5.8 | 247 | 60.96  | 7.62  | 6.1  | 1.68 | 7.8  | 0.9 | 4.0  |
| 89  | 118.62 | 15    | 6    | 3.5  | 5.6  | 1.9 | 2.7 | 248 | 76.2   | 9.14  | 6.1  | 3.96 | 4.5  | 2.3 | 0.8  |
| 90  | 108.75 | 14    | 6    | 3    | 6.3  | 1.6 | 3.3 | 249 | 91.44  | 12.19 | 6.1  | 3.96 | 5.3  | 2.2 | 1.7  |
| 91  | 53.86  | 7     | 6    | 5    | 3.9  | 3.1 | 0.0 | 250 | 76.2   | 9.14  | 6.1  | 1.68 | 7.9  | 0.9 | 4.6  |
| 92  | 98.72  | 13    | 6    | 4    | 5.3  | 2.2 | 1.9 | 251 | 33.53  | 6.71  | 5.49 | 3.96 | 7.5  | 2.4 | 0.4  |
| 93  | 170    | 22    | 6    | 2.6  | 6.9  | 1.4 | 4.9 | 252 | 115.82 | 9.14  | 6.1  | 1.83 | 4.9  | 1.0 | 2.7  |
| 94  | 154    | 21.37 | 6.26 | 2.72 | 7.0  | 1.4 | 4.9 | 253 | 169    | 21.81 | 6.19 | 2.58 | 6.8  | 1.4 | 4.9  |
| 95  | 171.7  | 21.19 | 6.81 | 2.9  | 5.8  | 1.5 | 3.9 | 254 | 70     | 12    | 6    | 2.6  | 9.1  | 1.4 | 4.7  |
| 96  | 151    | 23.85 | 6.15 | 3.34 | 7.0  | 1.8 | 4.7 | 255 | 104    | 11    | 6    | 3    | 5.0  | 1.7 | 2.1  |
| 97  | 137    | 21.82 | 5.84 | 2.84 | 8.1  | 1.5 | 5.6 | 256 | 110.5  | 12    | 5    | 2.8  | 6.1  | 1.5 | 3.0  |
| 98  | 106    | 15.84 | 6.35 | 3.16 | 6.9  | 1.7 | 3.8 | 257 | 110.5  | 12    | 5    | 3    | 5.9  | 1.6 | 2.7  |
| 99  | 91.44  | 6.1   | 6.1  | 1.52 | 4.1  | 0.8 | 1.9 | 258 | 70     | 20.57 | 5    | 2.6  | 16.9 | 1.4 | 11.9 |
| 100 | 60.96  | 9.75  | 5.49 | 2.29 | 9.5  | 1.3 | 4.6 | 259 | 70     | 15.44 | 5    | 2.6  | 13.1 | 1.4 | 8.0  |
| 101 | 114    | 12.8  | 5.49 | 1.98 | 7.6  | 1.1 | 4.9 | 260 | 93     | 10    | 6    | 2.9  | 5.1  | 1.6 | 2.0  |
| 102 | 146.3  | 17.37 | 5.49 | 2.13 | 7.6  | 1.1 | 5.4 | 261 | 84     | 11    | 5.89 | 2.77 | 6.7  | 1.5 | 3.0  |
| 103 | 91.44  | 12.8  | 5.49 | 2.07 | 9.2  | 1.1 | 5.7 | 262 | 84     | 11.5  | 5.89 | 2.77 | 7.0  | 1.5 | 3.3  |
| 104 | 114    | 17.37 | 5.49 | 1.98 | 10.3 | 1.1 | 7.5 | 263 | 47.24  | 6.1   | 7.62 | 5.18 | 2.8  | 3.3 | 0.0  |
| 105 | 106.68 | 9.14  | 6.1  | 1.68 | 5.7  | 0.9 | 3.3 | 264 | 64.01  | 6.1   | 6.25 | 3.44 | 3.3  | 2.0 | 0.2  |

|     |        |       |      |      |      |     |      |     |        |       |      |      |      |     |      |
|-----|--------|-------|------|------|------|-----|------|-----|--------|-------|------|------|------|-----|------|
| 106 | 140.21 | 12.8  | 5.49 | 2.44 | 5.4  | 1.3 | 3.0  | 265 | 91.44  | 10.67 | 6.1  | 4.27 | 4.3  | 2.4 | 1.0  |
| 107 | 93.88  | 9.75  | 5.49 | 1.98 | 6.8  | 1.1 | 3.7  | 266 | 38.1   | 4.27  | 5.49 | 1.52 | 6.4  | 0.9 | 1.8  |
| 108 | 39.62  | 6.1   | 6.1  | 2.59 | 6.6  | 1.5 | 1.3  | 267 | 106.68 | 12.19 | 6.1  | 4.27 | 4.3  | 2.4 | 1.3  |
| 109 | 91.44  | 6.1   | 6.1  | 1.55 | 4.0  | 0.9 | 1.8  | 268 | 88.39  | 9.14  | 6.1  | 3.05 | 4.6  | 1.7 | 1.5  |
| 110 | 62.48  | 10    | 6    | 2.2  | 9.2  | 1.2 | 4.7  | 269 | 85.34  | 7.62  | 6.1  | 3.05 | 3.8  | 1.7 | 0.8  |
| 111 | 62.48  | 15    | 6    | 2.1  | 14.9 | 1.1 | 10.0 | 270 | 108.51 | 8.84  | 6.4  | 2.29 | 4.2  | 1.3 | 1.8  |
| 112 | 62.48  | 9     | 6    | 2.25 | 7.9  | 1.2 | 3.6  | 271 | 79.4   | 24    | 6    | 3    | 14.4 | 1.6 | 10.2 |
| 113 | 70     | 15    | 6    | 3    | 10.5 | 1.6 | 5.8  | 272 | 138.89 | 17.78 | 6    | 3    | 6.3  | 1.6 | 3.8  |
| 114 | 122.17 | 12    | 6    | 2.8  | 5.0  | 1.5 | 2.4  | 273 | 138.89 | 31.06 | 6    | 3    | 10.2 | 1.6 | 7.8  |
| 115 | 122    | 15.4  | 6.6  | 2.5  | 6.6  | 1.3 | 4.1  | 274 | 79.4   | 19.47 | 6    | 3    | 12.0 | 1.6 | 7.7  |
| 116 | 122    | 15.4  | 6.6  | 2.5  | 6.6  | 1.3 | 4.1  | 275 | 60.96  | 7.01  | 6.71 | 3.35 | 4.0  | 2.0 | 0.5  |
| 117 | 94     | 10.22 | 6.78 | 3    | 4.6  | 1.7 | 1.8  | 276 | 30.48  | 6.1   | 6.1  | 3.2  | 7.5  | 1.9 | 0.7  |
| 118 | 94     | 10.2  | 6.8  | 2.8  | 4.8  | 1.5 | 2.0  | 277 | 44.2   | 6.1   | 6.1  | 4.27 | 4.3  | 2.6 | 0.0  |
| 119 | 45.72  | 6.1   | 6.1  | 2.9  | 5.3  | 1.7 | 0.7  | 278 | 42.8   | 7     | 6    | 2.2  | 8.4  | 1.2 | 2.9  |
| 120 | 60.96  | 7.62  | 6.1  | 2.9  | 5.5  | 1.6 | 1.4  | 279 | 67.8   | 11    | 6    | 4    | 6.4  | 2.3 | 1.7  |
| 121 | 76.2   | 9.14  | 6.1  | 2.9  | 5.5  | 1.6 | 1.9  | 280 | 67.8   | 11.73 | 6    | 4    | 6.9  | 2.3 | 2.1  |
| 122 | 91.44  | 10.67 | 6.1  | 2.9  | 5.6  | 1.6 | 2.3  | 281 | 36.3   | 8     | 6    | 3.7  | 8.5  | 2.1 | 1.3  |
| 123 | 40.07  | 8     | 6    | 3.2  | 8.4  | 1.8 | 1.9  | 282 | 51.8   | 10.98 | 6.02 | 2.88 | 10.3 | 1.6 | 4.5  |
| 124 | 40.07  | 7.5   | 6    | 3.2  | 7.7  | 1.8 | 1.5  | 283 | 124.9  | 18.27 | 5.73 | 2.67 | 7.9  | 1.4 | 5.2  |
| 125 | 56.11  | 7.5   | 6    | 3.5  | 5.2  | 2.0 | 0.8  | 284 | 110    | 17.82 | 6.18 | 3.46 | 7.1  | 1.9 | 4.0  |
| 126 | 111.91 | 13.4  | 6    | 3    | 5.8  | 1.6 | 2.9  | 285 | 146.2  | 19.89 | 6.29 | 2.91 | 6.6  | 1.6 | 4.4  |
| 127 | 121.02 | 13    | 6    | 3.5  | 4.7  | 1.9 | 2.0  | 286 | 68.9   | 12.9  | 6    | 3    | 9.1  | 1.6 | 4.4  |
| 128 | 143.26 | 12.8  | 5.49 | 1.68 | 6.7  | 0.9 | 4.6  | 287 | 34.5   | 5.5   | 6.5  | 5.5  | 3.7  | 3.7 | 0.0  |
| 129 | 140.72 | 15    | 6    | 2.7  | 5.6  | 1.5 | 3.3  | 288 | 33.8   | 8     | 6    | 2.4  | 12.1 | 1.3 | 4.4  |
| 130 | 83.43  | 12    | 6    | 2.8  | 7.3  | 1.5 | 3.5  | 289 | 52.8   | 8     | 6    | 3    | 6.7  | 1.7 | 1.7  |
| 131 | 101.21 | 12    | 6    | 2.3  | 6.8  | 1.2 | 3.8  | 290 | 38.37  | 8.1   | 6.4  | 5.9  | 5.7  | 3.7 | 0.0  |
| 132 | 114.35 | 12    | 6    | 2.3  | 6.0  | 1.2 | 3.4  | 291 | 52.8   | 11.3  | 6    | 3    | 10.2 | 1.7 | 4.4  |
| 133 | 119.41 | 15    | 6    | 2.3  | 7.3  | 1.2 | 4.7  | 292 | 45.72  | 6.1   | 6.1  | 4.57 | 3.9  | 2.9 | 0.0  |
| 134 | 114.3  | 12    | 6    | 2.6  | 5.6  | 1.4 | 2.9  | 293 | 219.46 | 21.73 | 5.58 | 3.17 | 4.8  | 1.7 | 3.1  |
| 135 | 104.76 | 12    | 6    | 4.8  | 4.1  | 2.7 | 0.9  | 294 | 76.2   | 7.62  | 6.1  | 4.57 | 3.2  | 2.7 | 0.1  |
| 136 | 130.75 | 15    | 6    | 2    | 7.4  | 1.1 | 5.0  | 295 | 106.68 | 6.71  | 5.49 | 1.19 | 5.2  | 0.6 | 3.1  |
| 137 | 44.55  | 12    | 6    | 2.5  | 14.6 | 1.4 | 7.8  | 296 | 36.58  | 6.1   | 6.1  | 3.66 | 5.7  | 2.2 | 0.2  |
| 138 | 44.55  | 12    | 6    | 3    | 13.0 | 1.6 | 5.9  | 297 | 51.82  | 7.62  | 6.1  | 3.66 | 5.5  | 2.1 | 0.7  |
| 139 | 40.3   | 8     | 6    | 2.1  | 11.1 | 1.2 | 4.8  | 298 | 137.16 | 12.8  | 5.49 | 3.66 | 4.2  | 2.0 | 1.6  |
| 140 | 37.36  | 10    | 6    | 2.8  | 13.1 | 1.6 | 5.3  | 299 | 91.44  | 9.14  | 6.1  | 4.57 | 3.4  | 2.7 | 0.4  |
| 141 | 70.76  | 14    | 6    | 2.6  | 10.6 | 1.4 | 6.1  | 300 | 45.72  | 7.62  | 6.1  | 4.88 | 5.2  | 3.0 | 0.1  |
| 142 | 44.55  | 6     | 6    | 3.3  | 5.0  | 2.0 | 0.4  | 301 | 19.81  | 7.62  | 6.1  | 3.2  | 15.8 | 1.8 | 3.1  |
| 143 | 87.53  | 12    | 6    | 3.6  | 5.9  | 2.0 | 2.2  | 302 | 29.77  | 14    | 5    | 3    | 25.5 | 1.6 | 13.3 |
| 144 | 90.22  | 8.53  | 6.71 | 2.9  | 4.0  | 1.6 | 1.2  | 303 | 58.53  | 11.42 | 6    | 3.5  | 8.4  | 2.0 | 3.0  |
| 145 | 115.82 | 7.62  | 6.1  | 1.83 | 3.9  | 1.0 | 1.8  | 304 | 58.53  | 14    | 6    | 3.5  | 10.6 | 1.9 | 4.8  |
| 146 | 84.84  | 7     | 6    | 2.26 | 4.2  | 1.3 | 1.4  | 305 | 42.59  | 15    | 6    | 3.7  | 15.0 | 2.0 | 6.9  |
| 147 | 84.84  | 7     | 6    | 2.26 | 4.2  | 1.3 | 1.4  | 306 | 13.22  | 8     | 6    | 2.6  | 29.3 | 1.5 | 9.6  |
| 148 | 84.84  | 7     | 6    | 2.26 | 4.2  | 1.3 | 1.4  | 307 | 65.78  | 10    | 5    | 2.2  | 9.9  | 1.2 | 5.1  |
| 149 | 61.5   | 9.47  | 6    | 1.98 | 9.4  | 1.1 | 5.0  | 308 | 54.65  | 10    | 5    | 2.2  | 11.9 | 1.2 | 6.1  |
| 150 | 61.5   | 9.26  | 6    | 1.98 | 9.1  | 1.1 | 4.7  | 309 | 54.99  | 9.47  | 5    | 3    | 9.1  | 1.7 | 3.1  |
| 151 | 58.71  | 11    | 6    | 2.3  | 10.6 | 1.3 | 5.6  | 310 | 45.72  | 6.55  | 6.4  | 3.51 | 5.0  | 2.1 | 0.4  |
| 152 | 58.71  | 7     | 6    | 2    | 6.6  | 1.1 | 2.6  | 311 | 82     | 12    | 6    | 3    | 7.1  | 1.6 | 3.2  |

|     |        |      |      |      |      |     |     |     |       |     |      |      |      |     |     |
|-----|--------|------|------|------|------|-----|-----|-----|-------|-----|------|------|------|-----|-----|
| 153 | 108.63 | 12.5 | 6    | 3.38 | 5.2  | 1.9 | 2.2 | 312 | 70.1  | 12  | 6    | 3.35 | 7.7  | 1.9 | 3.1 |
| 154 | 108.63 | 18.5 | 6    | 3.65 | 7.3  | 2.0 | 4.1 | 313 | 21.34 | 6.1 | 6.71 | 2.74 | 10.8 | 1.6 | 1.8 |
| 155 | 94.28  | 10   | 5    | 1.4  | 9.3  | 0.7 | 6.3 | 314 | 30.48 | 6.4 | 6.4  | 3.66 | 7.0  | 2.2 | 0.4 |
| 156 | 94.28  | 10   | 5    | 1.7  | 8.2  | 0.9 | 5.0 | 315 | 41.15 | 6.4 | 6.4  | 1.98 | 7.8  | 1.1 | 2.7 |
| 157 | 51.82  | 9.14 | 6.1  | 1.68 | 11.7 | 0.9 | 6.8 | 316 | 78.54 | 14  | 6    | 2.7  | 9.3  | 1.5 | 5.3 |
| 158 | 64.01  | 7.62 | 7.62 | 3.05 | 4.1  | 1.7 | 0.9 | 317 | 78.54 | 14  | 6    | 2.4  | 10.1 | 1.3 | 6.1 |
| 159 | 48.77  | 9.14 | 6.1  | 4.27 | 6.7  | 2.5 | 1.0 |     |       |     |      |      |      |     |     |

**Table S5.** The stable pillar cases in Vaal Basin, Free State and Klip river coal fields of South Africa.

| No. | $H$ ,<br>(m) | $w_{p'}$ ,<br>(m) | $w_{c'}$ ,<br>(m) | $h$ ,<br>(m) | $SF_0$ | $d_{m'}$ ,<br>(m) | $SF_p$ |
|-----|--------------|-------------------|-------------------|--------------|--------|-------------------|--------|
| 1   | 64.24        | 5.59              | 5.05              | 1            | 3.3    | 0.9               | 1.3    |
| 2   | 59.98        | 6.19              | 5.86              | 1.52         | 2.6    | 1.3               | 0.7    |
| 3   | 17.91        | 4.31              | 5.62              | 1.71         | 5.0    | 1.6               | 0.2    |
| 4   | 29.56        | 6.2               | 6                 | 2.1          | 4.2    | 1.9               | 0.4    |
| 5   | 223.38       | 28                | 5                 | 3.5          | 2.2    | 2.9               | 1.3    |
| 6   | 173.22       | 25                | 5                 | 4.2          | 2.3    | 3.4               | 1.1    |
| 7   | 215.05       | 35                | 5                 | 3            | 3.0    | 2.5               | 2.1    |
| 8   | 254.45       | 35                | 5                 | 4            | 2.1    | 3.2               | 1.3    |
| 9   | 215.05       | 25                | 5                 | 3            | 2.4    | 2.5               | 1.4    |
| 10  | 84.65        | 6                 | 6                 | 1.75         | 1.6    | 1.5               | 0.3    |
| 11  | 182.88       | 16.92             | 5.94              | 2.44         | 2.1    | 2.1               | 1.1    |
| 12  | 91.44        | 12.19             | 6.1               | 1.52         | 4.0    | 1.3               | 2.2    |
| 13  | 35.05        | 9.75              | 5.49              | 2.44         | 6.3    | 2.1               | 1.5    |
| 14  | 50.6         | 6.1               | 6.1               | 1.37         | 3.2    | 1.2               | 0.9    |
| 15  | 76.2         | 9.14              | 6.1               | 1.37         | 3.6    | 1.2               | 1.8    |
| 16  | 35.05        | 7.32              | 4.88              | 2.59         | 4.7    | 2.3               | 0.4    |
| 17  | 42           | 5                 | 10                | 1.8          | 1.3    | 1.6               | 0.1    |
| 18  | 36           | 5                 | 7                 | 2.4          | 1.9    | 2.3               | 0.0    |
| 19  | 38           | 5                 | 7                 | 1.8          | 2.2    | 1.6               | 0.2    |
| 20  | 22           | 6                 | 6                 | 1.5          | 6.8    | 1.3               | 1.7    |
